# Supplementary material for: Anti–phagocytosis-blocking repolarization-resistant membrane-fusogenic liposome (ARMFUL) for adoptive cell immunotherapy
Source: PubMed Central journal article supplement — Sci Adv. 2023 Aug 9;9(32):eadh2413. doi: 10.1126/sciadv.adh2413 (PMC10411906; doi:10.1126/sciadv.adh2413), 2023-08-09
Supplement: sciadv.adh2413_sm.pdf [file sciadv.adh2413_sm.pdf]

Supplementary Materials for  
**Anti-phagocytosis-blocking repolarization-resistant membrane-fusogenic liposome (ARMFUL) for adoptive cell immunotherapy**

Chunxiong Zheng *et al.*

Corresponding author: Fangfang Cao, [cffdc@nus.edu.sg](mailto:cffdc@nus.edu.sg); Yu Tao, [taoy28@mail.sysu.edu.cn](mailto:taoy28@mail.sysu.edu.cn);  
Xiaoyuan Chen, [chen.shawn@nus.edu.sg](mailto:chen.shawn@nus.edu.sg); Mingqiang Li, [limq567@mail.sysu.edu.cn](mailto:limq567@mail.sysu.edu.cn)

*Sci. Adv.* **9**, eadh2413 (2023)  
DOI: 10.1126/sciadv.adh2413

**The PDF file includes:**

Figs. S1 to S24  
Legends for movies S1 and S2

**Other Supplementary Material for this manuscript includes the following:**

Movies S1 and S2

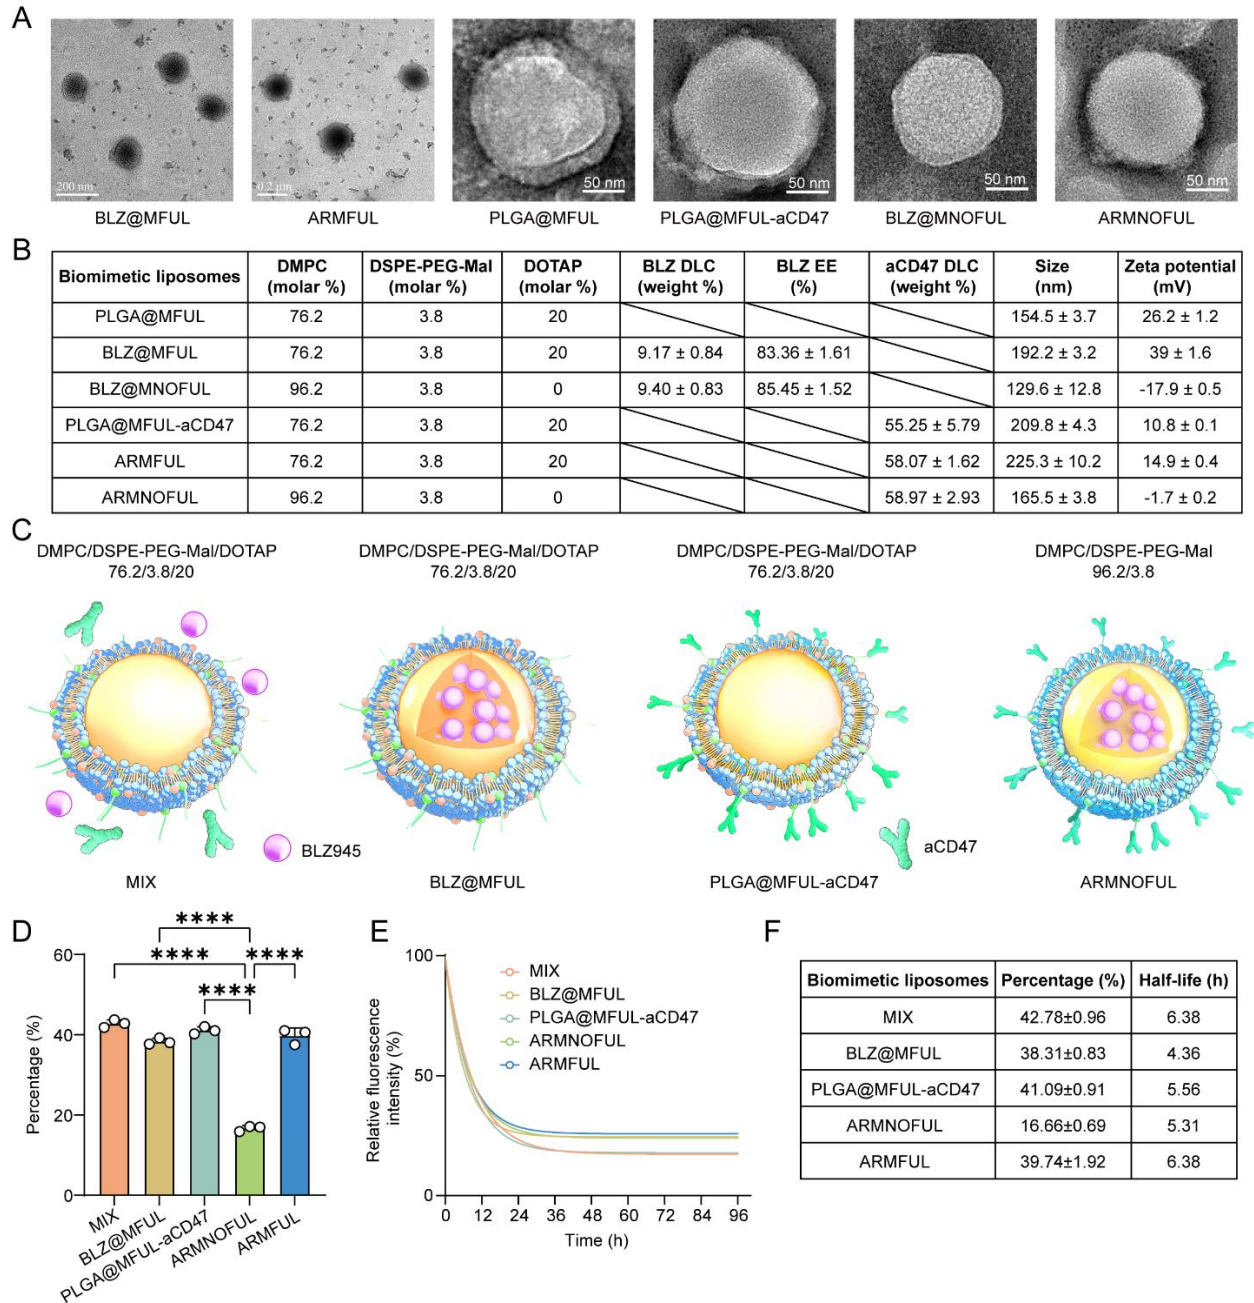

**Fig. S1. Characterization of ARMFUL and the contrastive nanoparticles.**

(A), TEM images of the BLZ@MFUL, ARMFUL, PLGA@MFUL, PLGA@MFUL-aCD47, BLZ@MNOFUL, and ARMNOFUL. (B), Physicochemical characterizations of six different biomimetic liposomes. DLC, drug loading capacity. EE, encapsulation efficiency. (C), Schematic representation of other interventions including MIX, PLGA@MFUL-aCD47, BLZ@MFUL, and ARMNOFUL. (D), The percentage of liposomes that successfully get into the macrophages. (E), The half-life curves of liposomes. (F), The summarization of the percentage and half-life of liposomes. Data are presented as means ± SD, n = 6 (B) or 3 (D, F) biologically independent samples. Statistical significance is calculated by t-test: \* p < 0.05, \*\* p < 0.01, \*\*\* p < 0.001 and \*\*\*\* p < 0.0005.

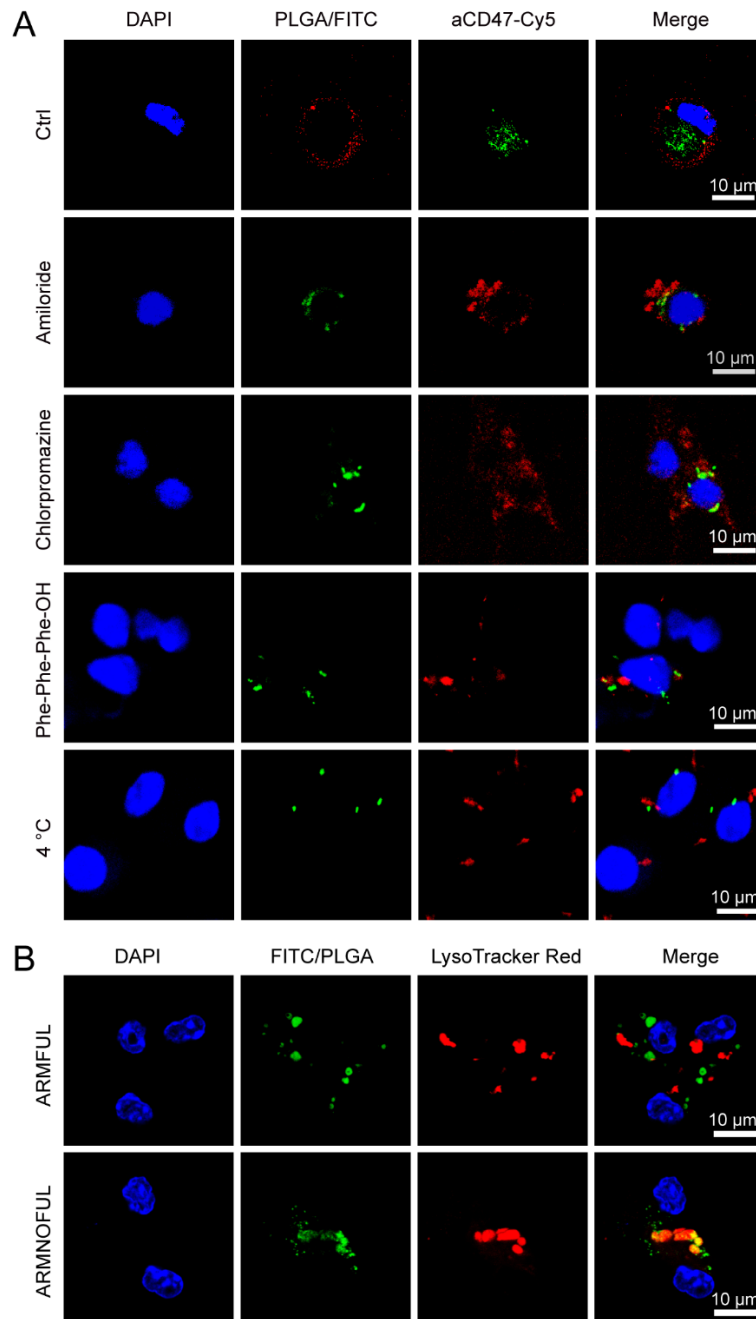

**Fig. S2. Confocal laser scanning microscopy (CLSM) images of bone marrow-derived macrophages (BMDMs) after incubation with ARMFUL.**

(A), CLSM images of BMDMs after treatment with cell-uptake inhibitors. Blue fluorescence: nuclei stained with DAPI; green fluorescence: FITC-labeled PLGA-based polymeric core; and red fluorescence: Cy5-labeled aCD47. (B), CLSM images of BMDMs after incubation with FITC@ARMFUL and FITC@ARMNOFUL. Blue fluorescence: nuclei stained with DAPI; green fluorescence: FITC/PLGA core; and red fluorescence: LysoTracker Red DND-99.

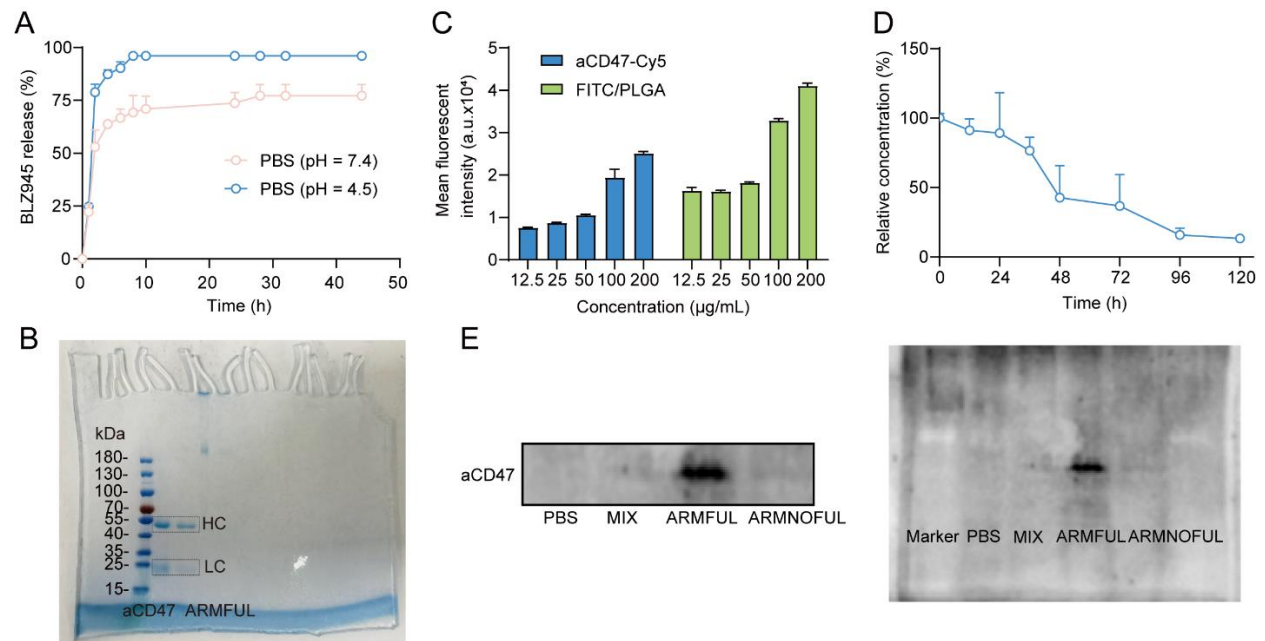

**Fig. S3. Release profile, gel electrophoresis analysis and cell uptake of ARMFUL.**

(A), Accumulative release of BLZ945 from PLGA cores in the PBS (pH 7.4 or 4.5). (B), Gel electrophoresis showing the heavy chain (HC) and light chain (LC) released from free aCD47 and ARMFUL. The gel was stained with Coomassie Brilliant Blue. The molecular weights of HC and LC are approximately 50 kDa and 25 kDa, respectively. (C), Mean fluorescent intensity of BMDMs after incubation with FITC@ARMFUL-Cy5.  $1 \times 10^6$  BMDMs were treated with different concentrations of biomimetic liposomes. (D), The relative content of BLZ945 in the macrophages after ARMFUL engineering. BLZ945 concentration in the cells was detected by high-performance liquid chromatography (HPLC). (E), Western blot analysis of aCD47 on the cell membrane after treatment with PBS, MIX, ARMFUL, and ARMNOFUL. Data represent mean  $\pm$  SD,  $n = 3$  biologically independent samples.

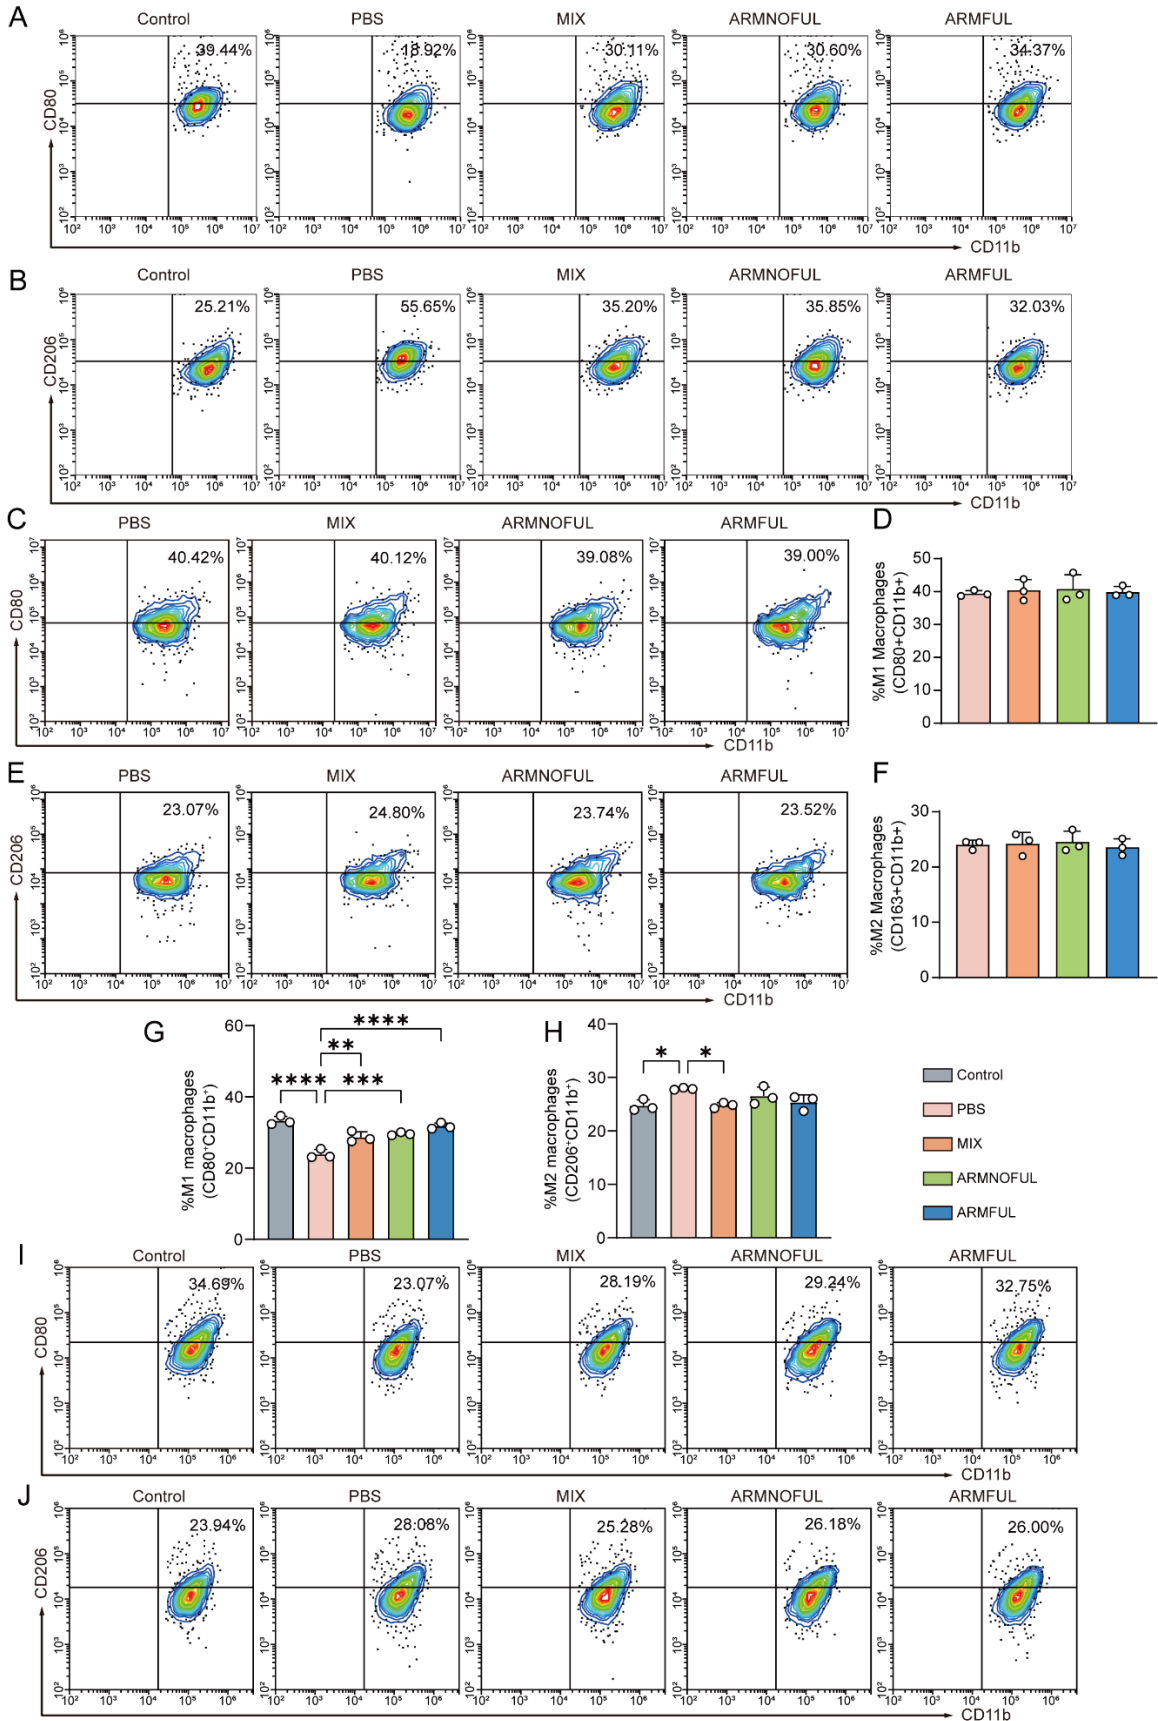

**Fig. S4. Fluorescence-activated cell sorting (FACS) analysis of M1/M2-related biomarkers on macrophages after treatment with the medium containing IL-4.**

(A, B), Engineered BMDMs were stimulated with IL-4 for 24 h. The graphs of M1 (CD80<sup>+</sup>CD11b<sup>+</sup>) (A) and M2 (CD206<sup>+</sup>CD11b<sup>+</sup>) macrophages (B) were analyzed by flow cytometry. (C, D, E, F), The level of M1 (CD80<sup>+</sup>CD11b<sup>+</sup>) (C, D) and M2 (CD206<sup>+</sup>CD11b<sup>+</sup>) (E, F) markers before treatment with IL-4. The cells were gated from F4/80<sup>+</sup>CD11b<sup>+</sup> populations in the FACS profile. (G, H, I, J), The percent of M1 (CD80<sup>+</sup>CD11b<sup>+</sup>) (G, I) and M2 (CD206<sup>+</sup>CD11b<sup>+</sup>) (H, J) populations in engineered macrophages after treatment with B16F10 tumor cell conditioned medium, respectively. The cells were gated from F4/80<sup>+</sup>CD11b<sup>+</sup> populations in the FACS profile. Data represent mean  $\pm$  SD, n = 3 biologically independent samples. Statistical significance was calculated by one-way ANOVA with Dunnett's multiple comparison tests: \* p < 0.05, \*\* p < 0.01, \*\*\* p < 0.001 and \*\*\*\* p < 0.0005.

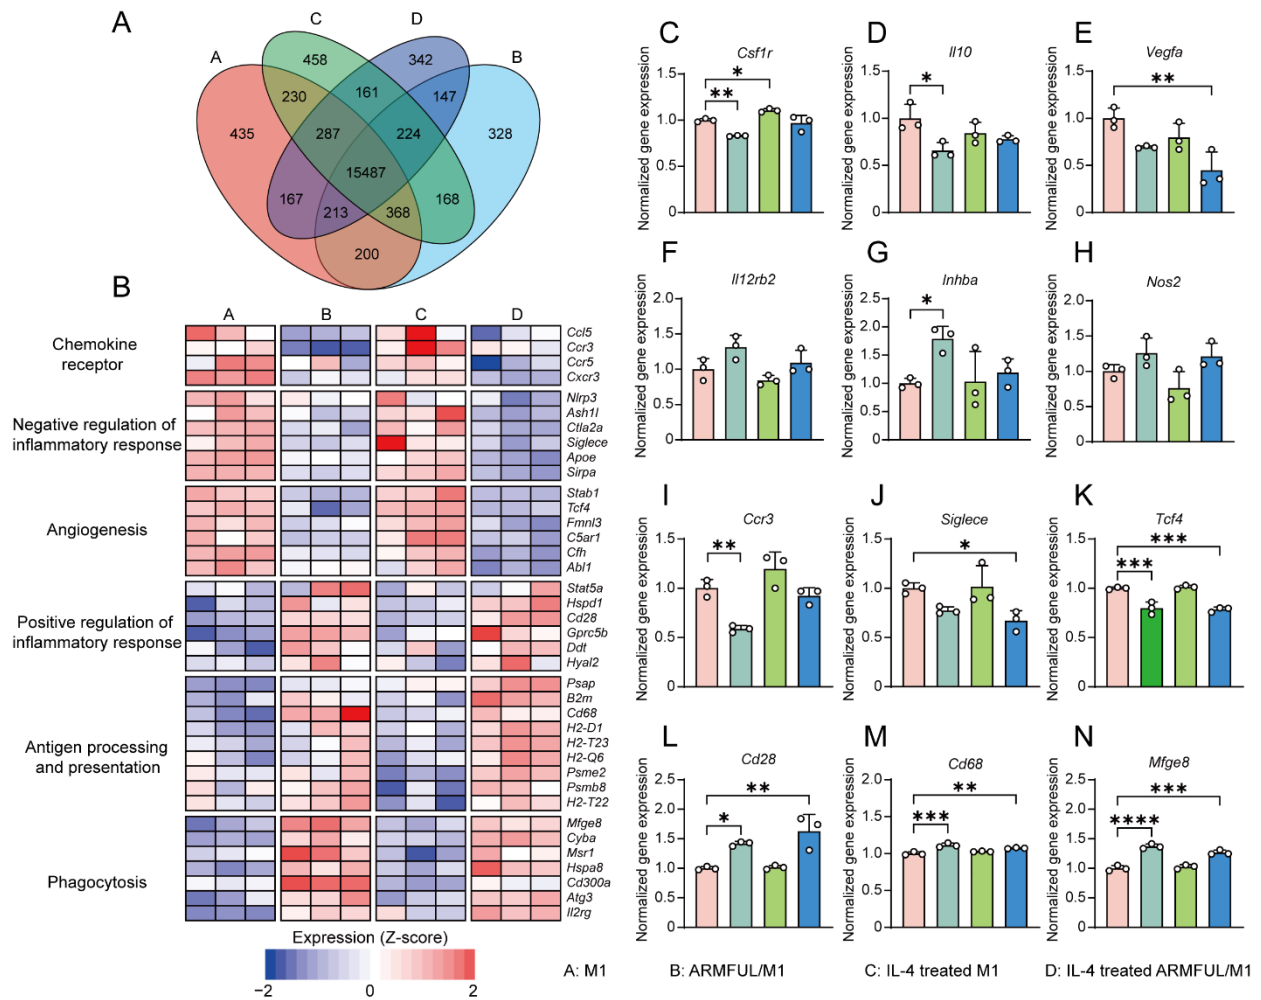

**Fig. S5. RNA sequencing analysis of native M1 macrophages and ARMFUL/M1 with/without IL-4 treatment.**

(A), Venn diagram of the whole expressed genes. (B), Expression of selected genes related to chemokine receptor, negative regulation of inflammatory response, angiogenesis, positive regulation of inflammatory response, antigen processing and presentation, and phagocytosis in M1 macrophages and engineered M1 macrophages with/without IL-4 treatment (n = 3/group). (C-N), Normalized gene expression of representative genes based on counts. Data represent mean  $\pm$  SD (C-N). Statistical significance by one-way ANOVA with Dunnett's multiple comparison tests: \*  $p < 0.05$ , \*\*  $p < 0.01$ , \*\*\*  $p < 0.001$  and \*\*\*\*  $p < 0.0005$ .



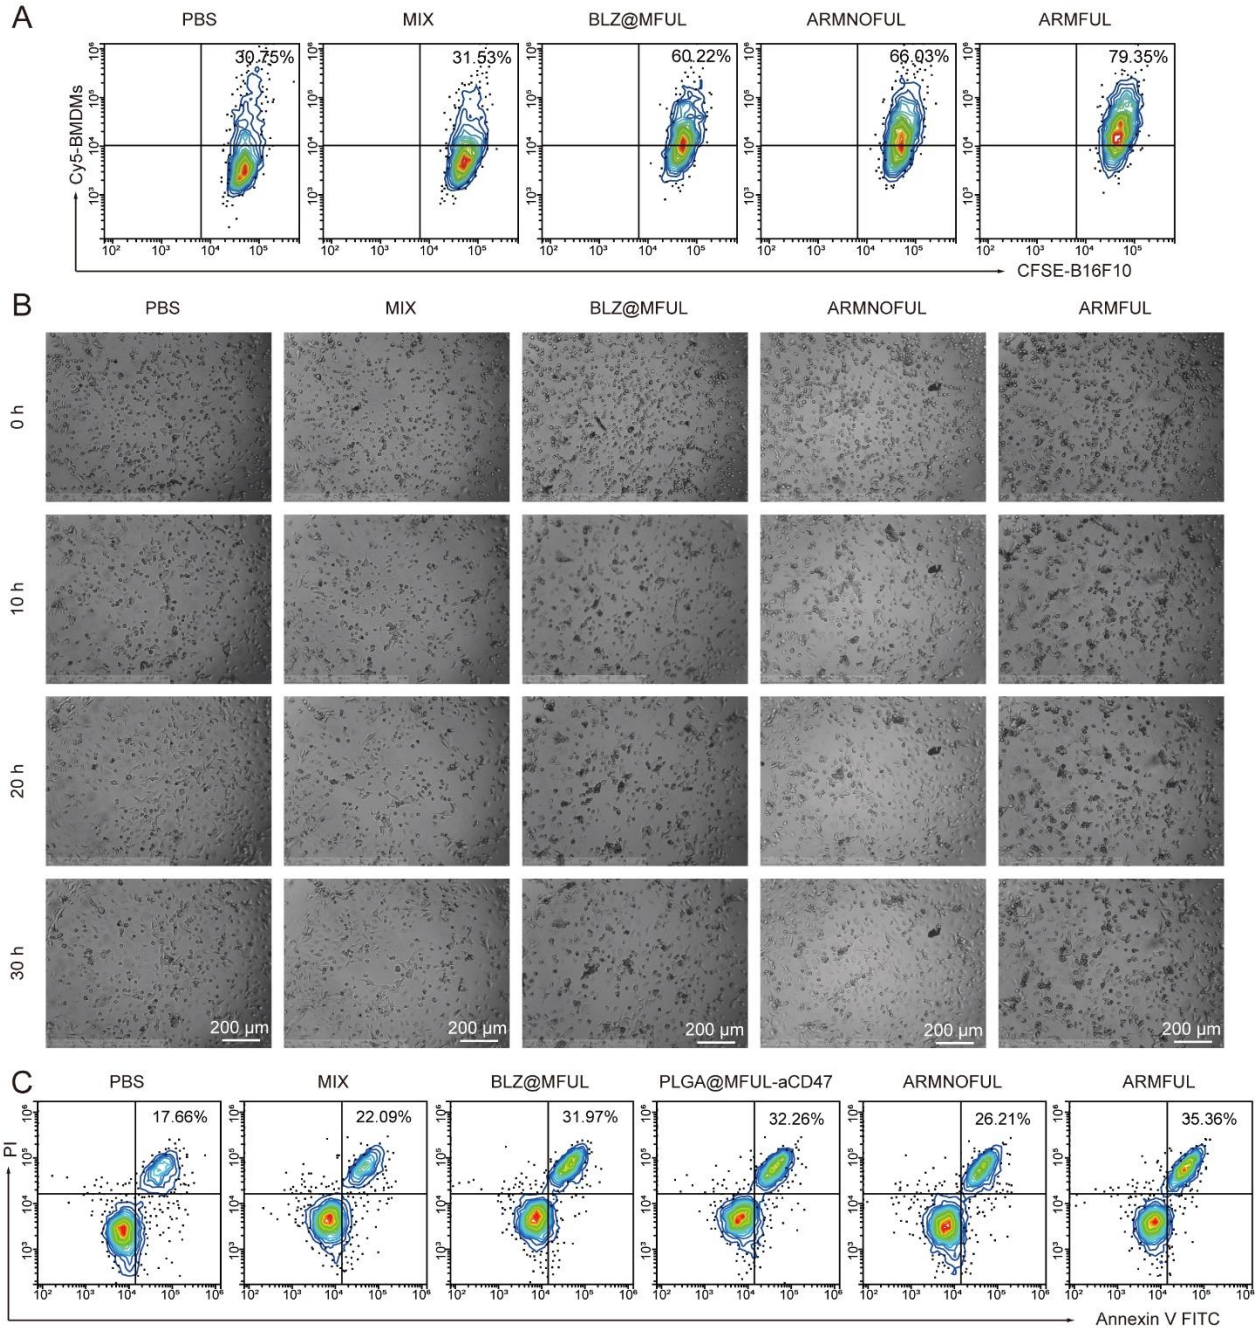

**Fig. S6. The enhanced phagocytosis ability of ARMFUL/M1.**

(A), The percentage of macrophages phagocytosing B16F10 cancer cells. Macrophages were labeled with DSPE-PEG-Cy5, while B16F10 cancer cells were labeled with CFSE. The cells were gated from CFSE<sup>+</sup> populations in the FACS profile. (B), Representative images of macrophages phagocytosing B16F10 cancer cells at 0, 10, 20, and 30 h. The views were recorded through a live cell dynamic imaging and analysis system every 10 minutes for 36 h. (C), The apoptosis percentage of B16F10 cells after coculturing with engineered BMDMs. The cells were treated with Annexin V-FITC/PI Apoptosis Detection Kit, then analyzed for Annexin V and PI staining on a flow cytometer and calculated apoptosis.



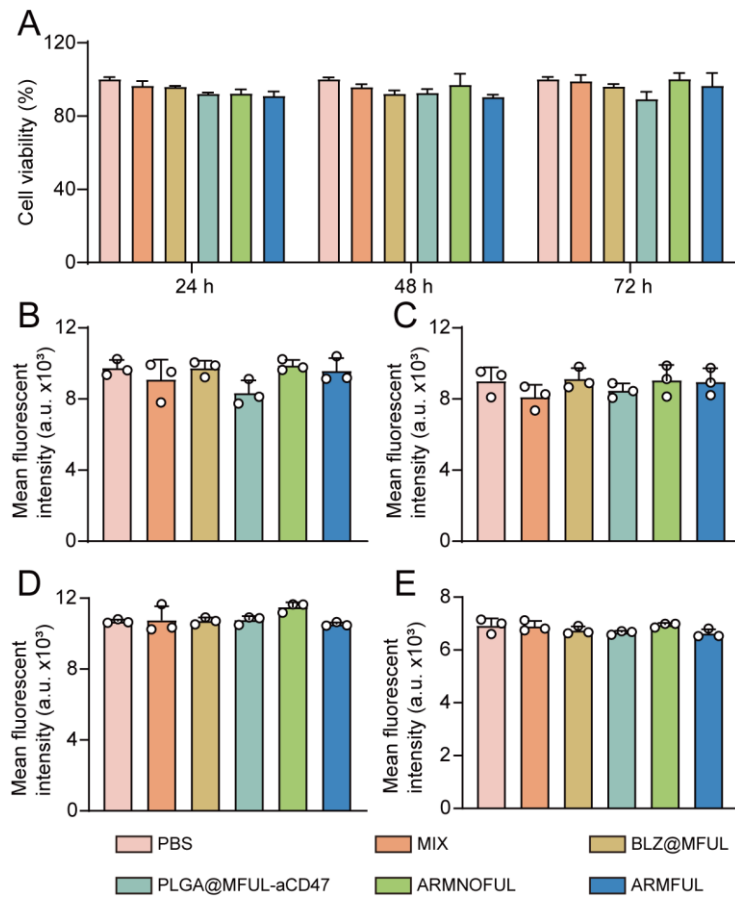

**Fig. S7. Cell viability of BMDMs after ARMFUL engineering and its potential effect on macrophage functions.**

(A), Cell viability of engineered BMDMs at 24, 48, and 72 h after treatment with ARMFUL, determined by CCK-8 assays. There was no significance between groups within 72 h, indicating the good biocompatibility of ARMFULs. (B, C), The expression of iNOS (B) and HIF-1 $\alpha$  (C) on macrophages engineered with different liposomes. (D, E), The expression of TLR2 (D) and TLR4 (E) in M1 macrophages after engineering with different liposomes. Data represent mean  $\pm$  SD, n = 3 biologically independent samples.

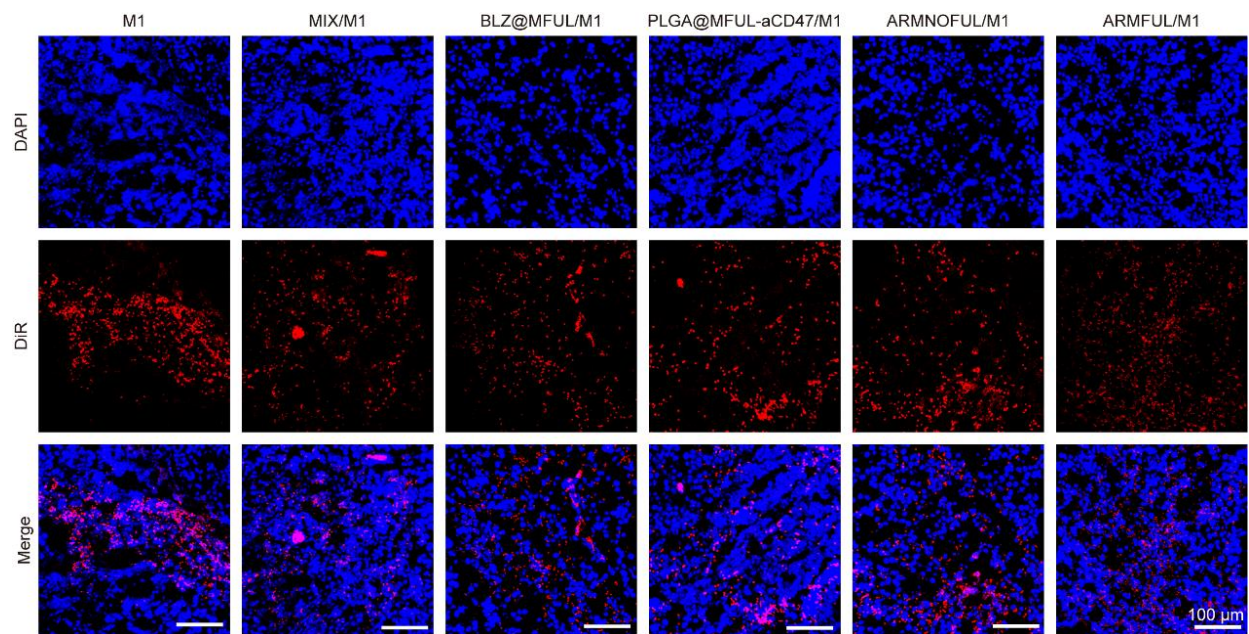

**Fig. S8. CLSM images of tumor tissues from mice treated with DiR-labelled ARMFUL/M1.** The CLSM images of tumor tissue slices showed that engineered macrophages could infiltrate into tumors effectively. Blue fluorescence: nuclei stained with DAPI; Red fluorescence: macrophages stained with DiR.

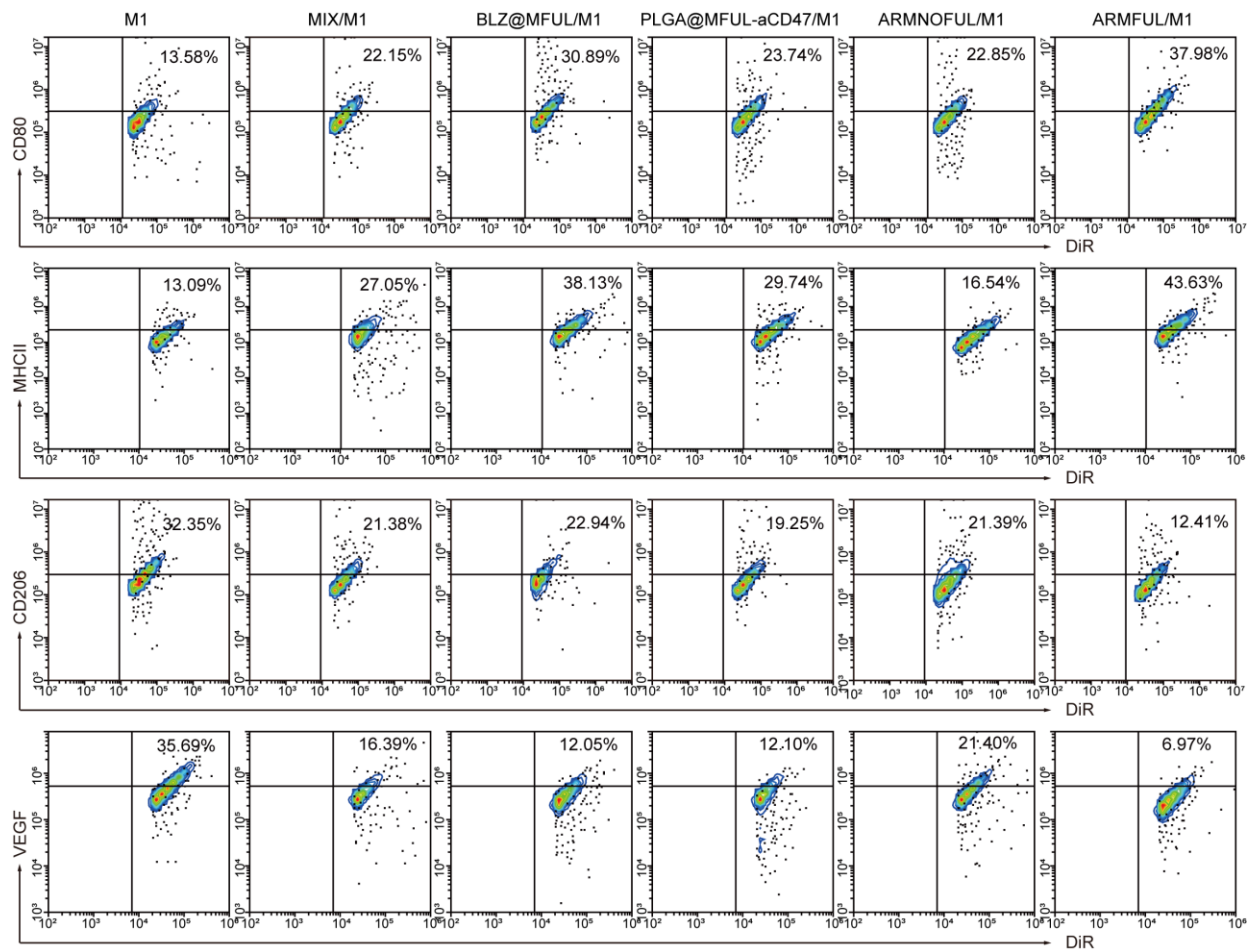

**Fig. S9.** The percentage of CD80<sup>+</sup>, MHCII<sup>+</sup>, CD206<sup>+</sup>, and VEGF<sup>+</sup> populations in adoptively transferred macrophages in tumors.

The cells were gated from F4/80<sup>+</sup>DiR<sup>+</sup> populations in the FACS profile.

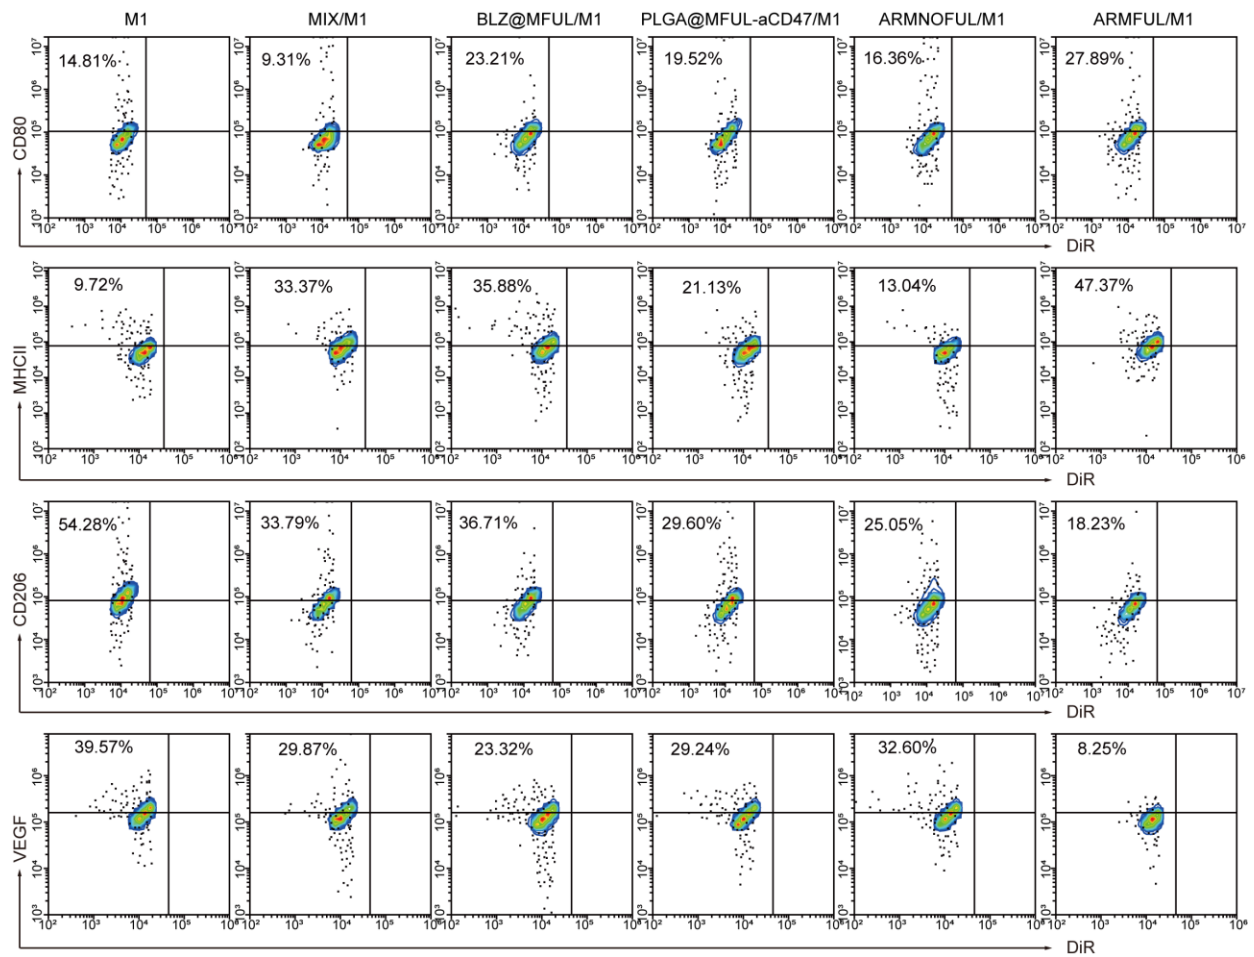

**Fig. S10. The percentage of CD80<sup>+</sup>, MHCII<sup>+</sup>, CD206<sup>+</sup>, and VEGF<sup>+</sup> cells in tumor-associated macrophages in tumors.**

The cells were gated from F4/80<sup>+</sup>DiR<sup>-</sup> populations in the FACS profile.

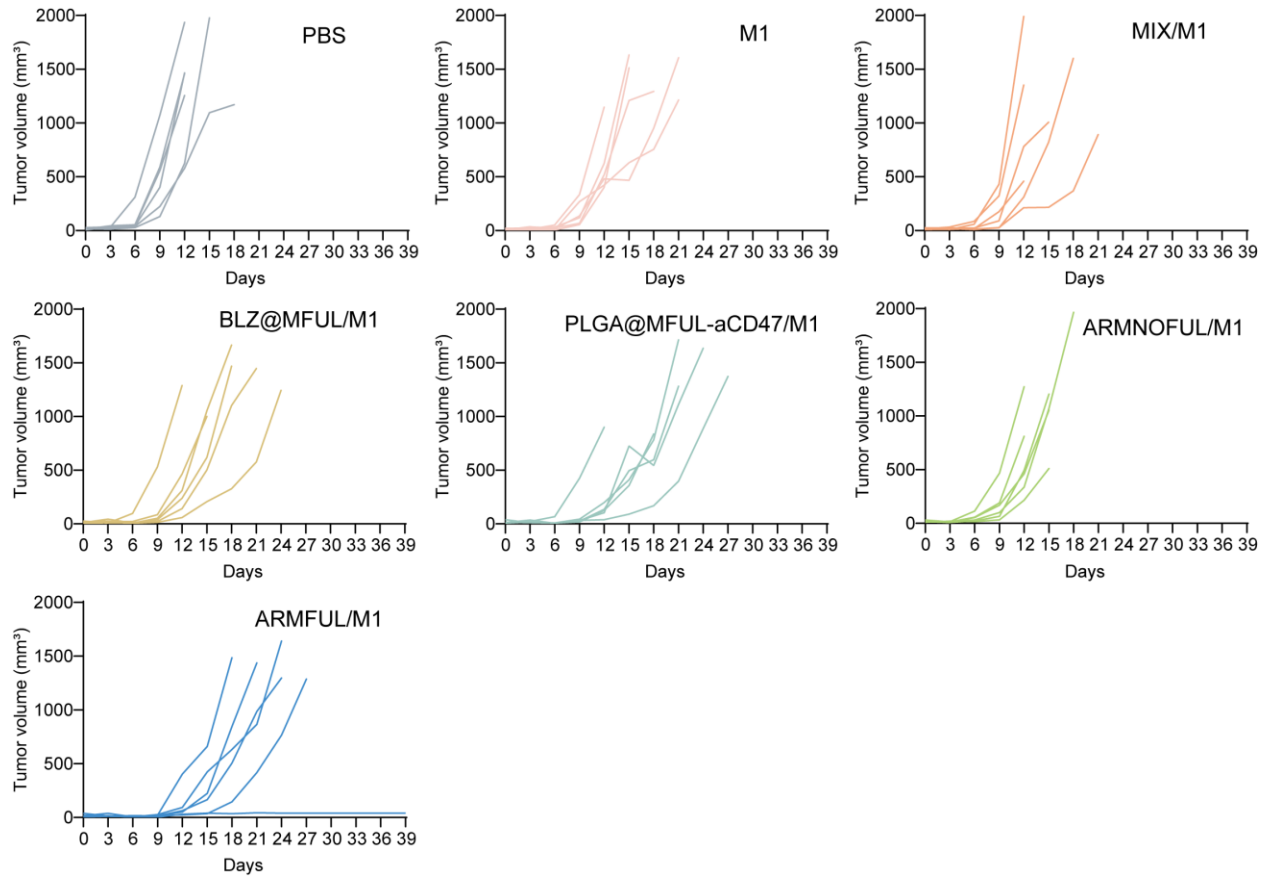

**Fig. S11. Growth curves of tumors in individual mice burdened with B16F10-Luc cells after intravenous injection of PBS, M1 macrophages, and engineered M1 macrophages.**



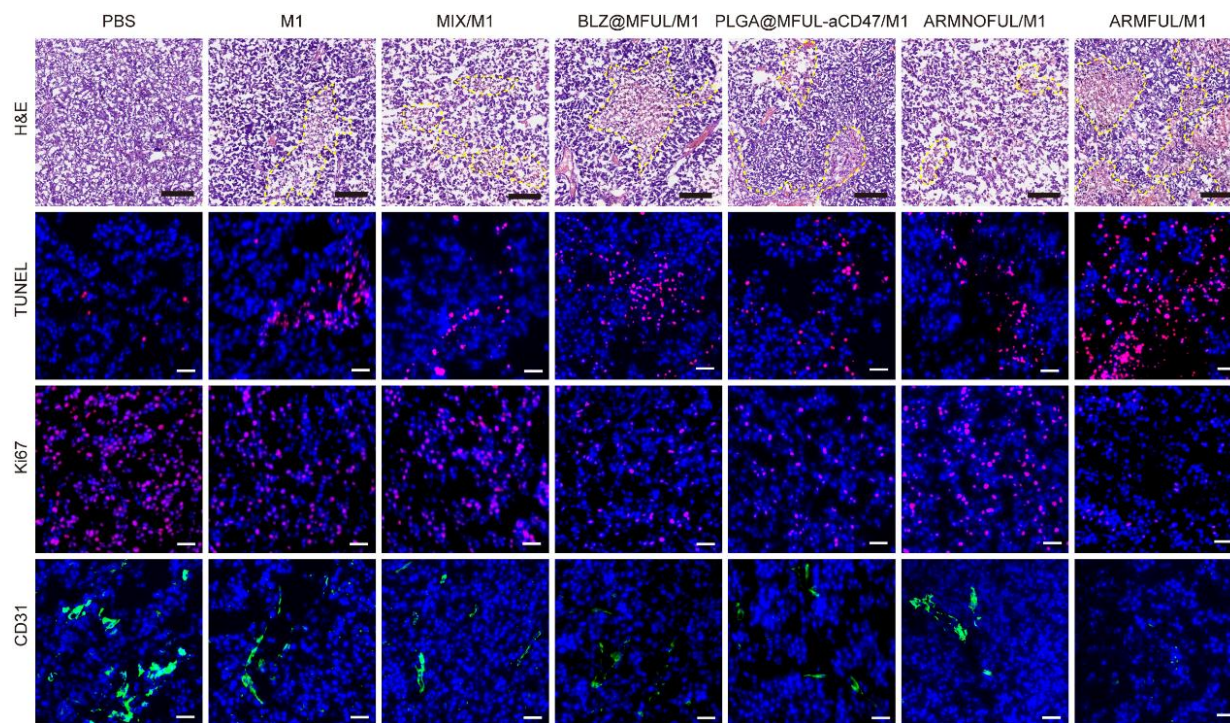

**Fig. S12. Immunohistochemical and immunofluorescence analysis of tumor tissues.**

Representative H&E staining images and immunofluorescence staining images for TUNEL (red), Ki67 (red), and CD31 (green) of tumor slices from mice burdened with B16F10-Luc cells after intravenous injection of PBS, M1 macrophages, and engineered M1 macrophages. The scale bar is 200  $\mu\text{m}$ .

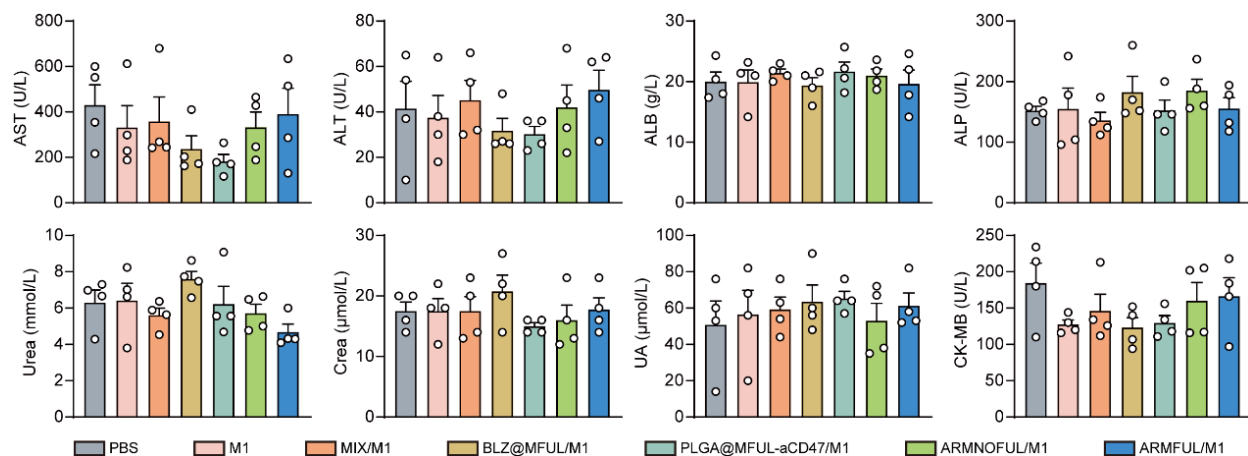

**Fig. S13. Serum biochemical analysis of mice treated with ARMFUL/M1.**

Serum biochemical parameters of mice burdened with B16F10-Luc cells after treatment, including aspartate transaminase (AST), alanine transaminase (ALT), albumin (ALB), alkaline phosphatase (ALP), urea nitrogen (Urea), creatinine (Crea), uric acid (UA), and creatine kinase-MB (CK-MB), n = 4 biologically independent mice.



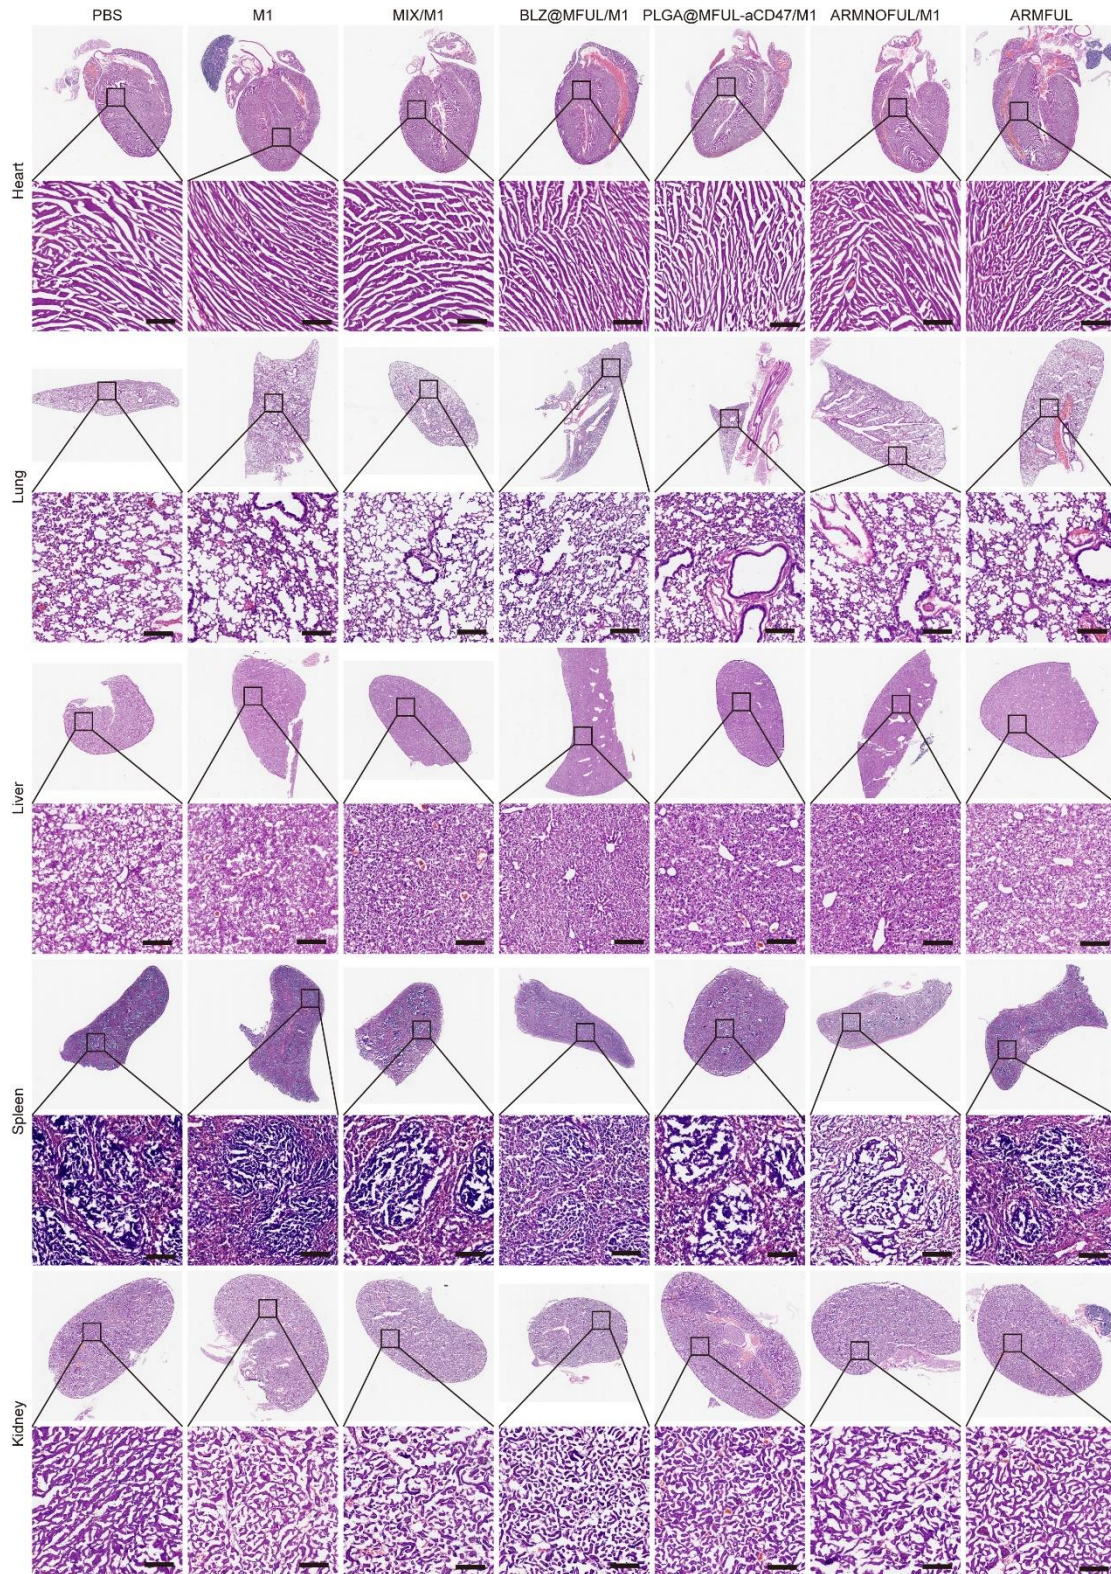

**Fig. S14. Immunohistochemical analysis for tissue damage.**

H&E staining images of major organ slices from mice burdened with B16F10-Luc cells after treatment. The scare bar is 200  $\mu$ m.

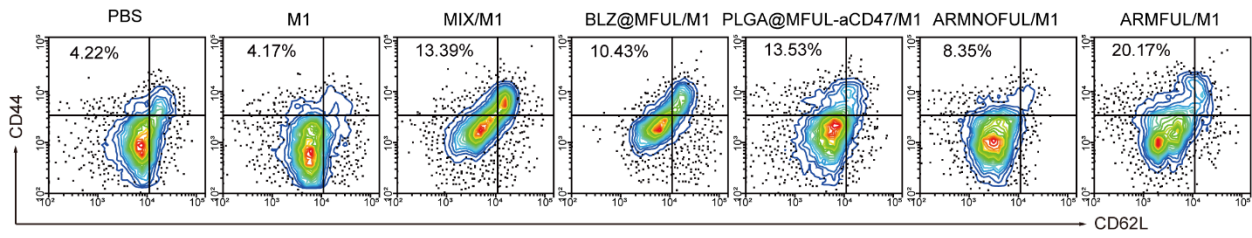

**Fig. S15. The percentage of effector memory T cells in the spleen.**

The CD62<sup>-</sup>CD44<sup>+</sup> T cells were gated from CD45<sup>+</sup>CD4<sup>+</sup> populations in the FACS profile.



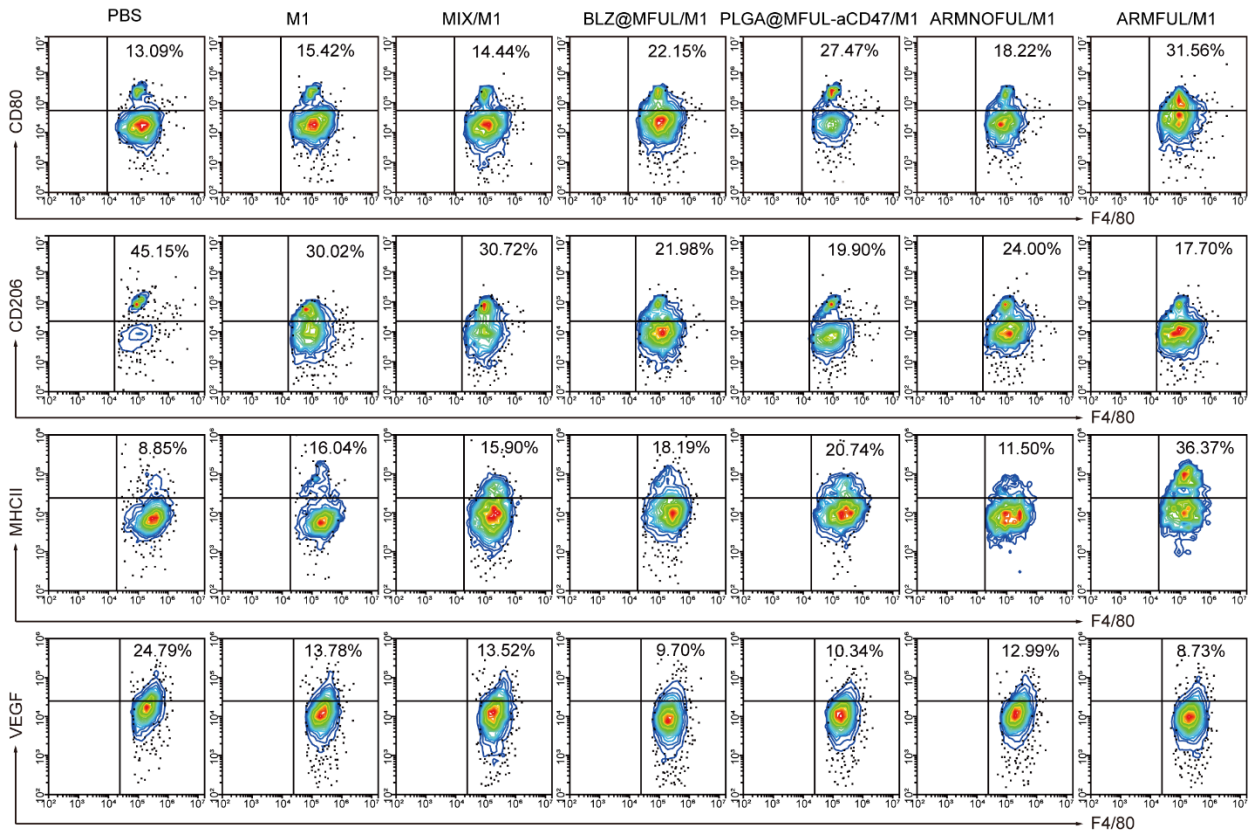

**Fig. S16. The percentage of CD80<sup>+</sup>, MHCII<sup>+</sup>, CD206<sup>+</sup>, and VEGF<sup>+</sup> macrophages in tumors.** The cells were gated from CD45<sup>+</sup>F4/80<sup>+</sup>CD11b<sup>+</sup> populations in the FACS profile.



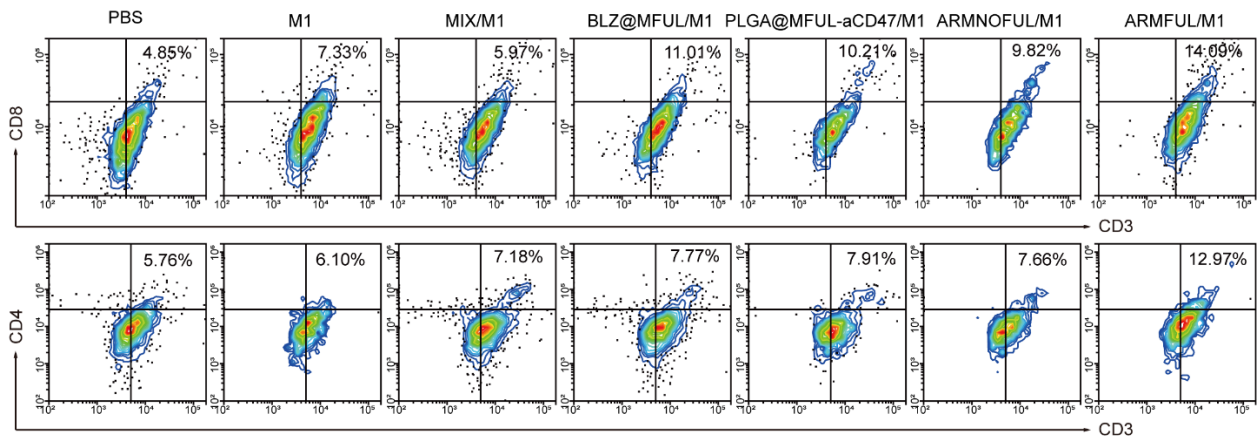

**Fig. S17. The percentage of CD8<sup>+</sup> and CD4<sup>+</sup> T cells in tumors.**  
 The cells were gated from CD45<sup>+</sup> populations in the FACS profile.

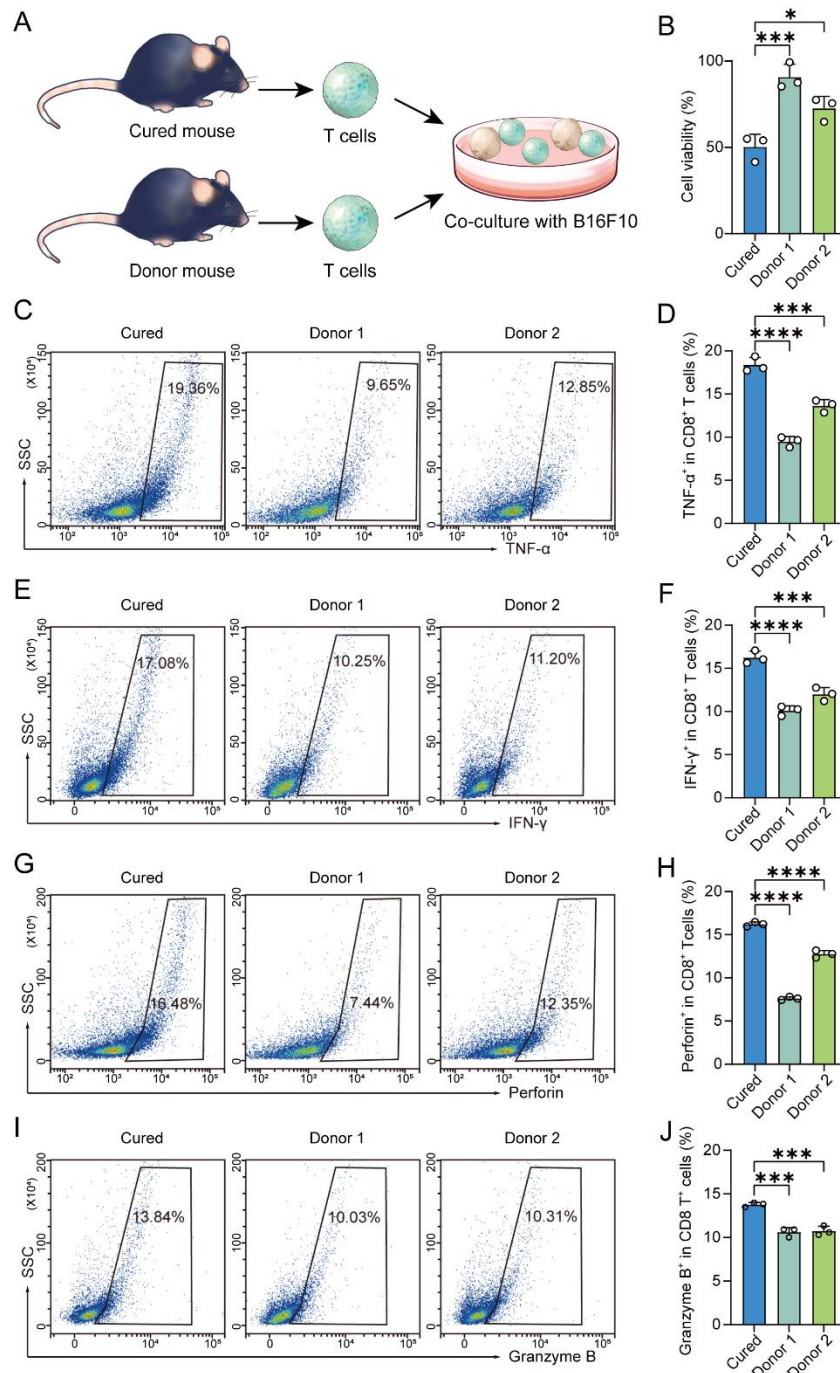

**Fig. S18. Systemic immunological memory after BMFL-engineered M1 macrophage treatment.**

(A), Schematic representation of the systemic immunological memory assay. T cells were isolated from the spleen of the cured or same-age donor mice, then co-cultured with B16F10-Luc cells. (B), Cell viability of B16F10-Luc cells after incubation with T cells. (C-J), The percentage of TNF $\alpha$ <sup>+</sup>, IFN $\gamma$ <sup>+</sup>, perforin<sup>+</sup>, and granzyme B<sup>+</sup> T cell after co-culturing with B16F10-Luc cells. Data represent mean  $\pm$  SD (D, F, H, J). Statistical significance was calculated by one-way ANOVA with Dunnett's multiple comparison tests: \*  $p < 0.05$ , \*\*  $p < 0.01$ , \*\*\*  $p < 0.001$ , and \*\*\*\*  $p < 0.0005$ .

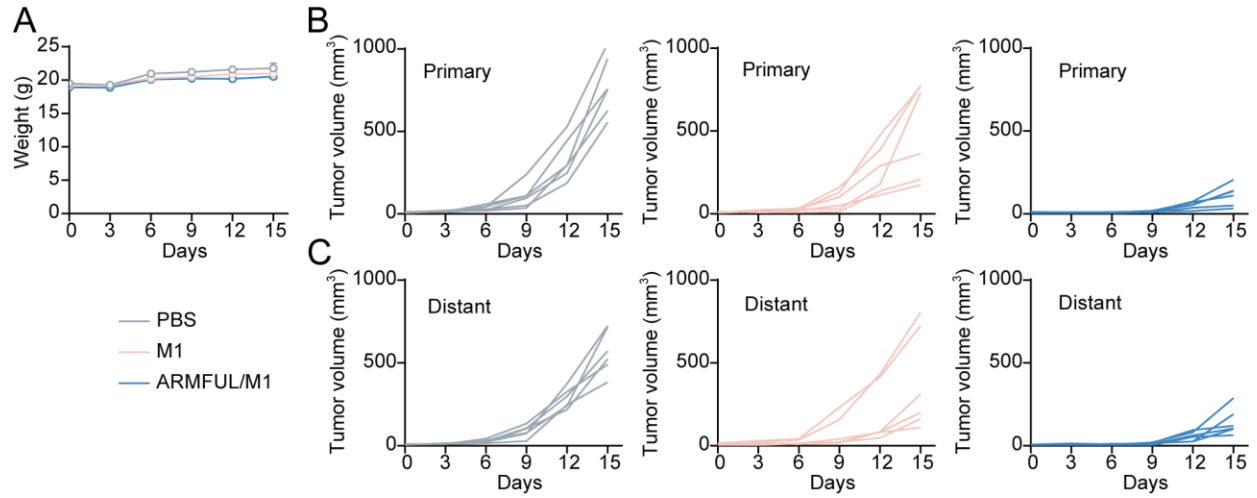

**Fig. S19. Weight change and individual tumor growth curve of mice.**

(A), Weight change of mice burdened with B16F10 cells after treatment (n = 6/group). (B), Growth curves of tumors in individual mice burdened with B16F10 cells after intratumor injection of PBS, M1 macrophages, and engineered M1 macrophages (n = 6/group).

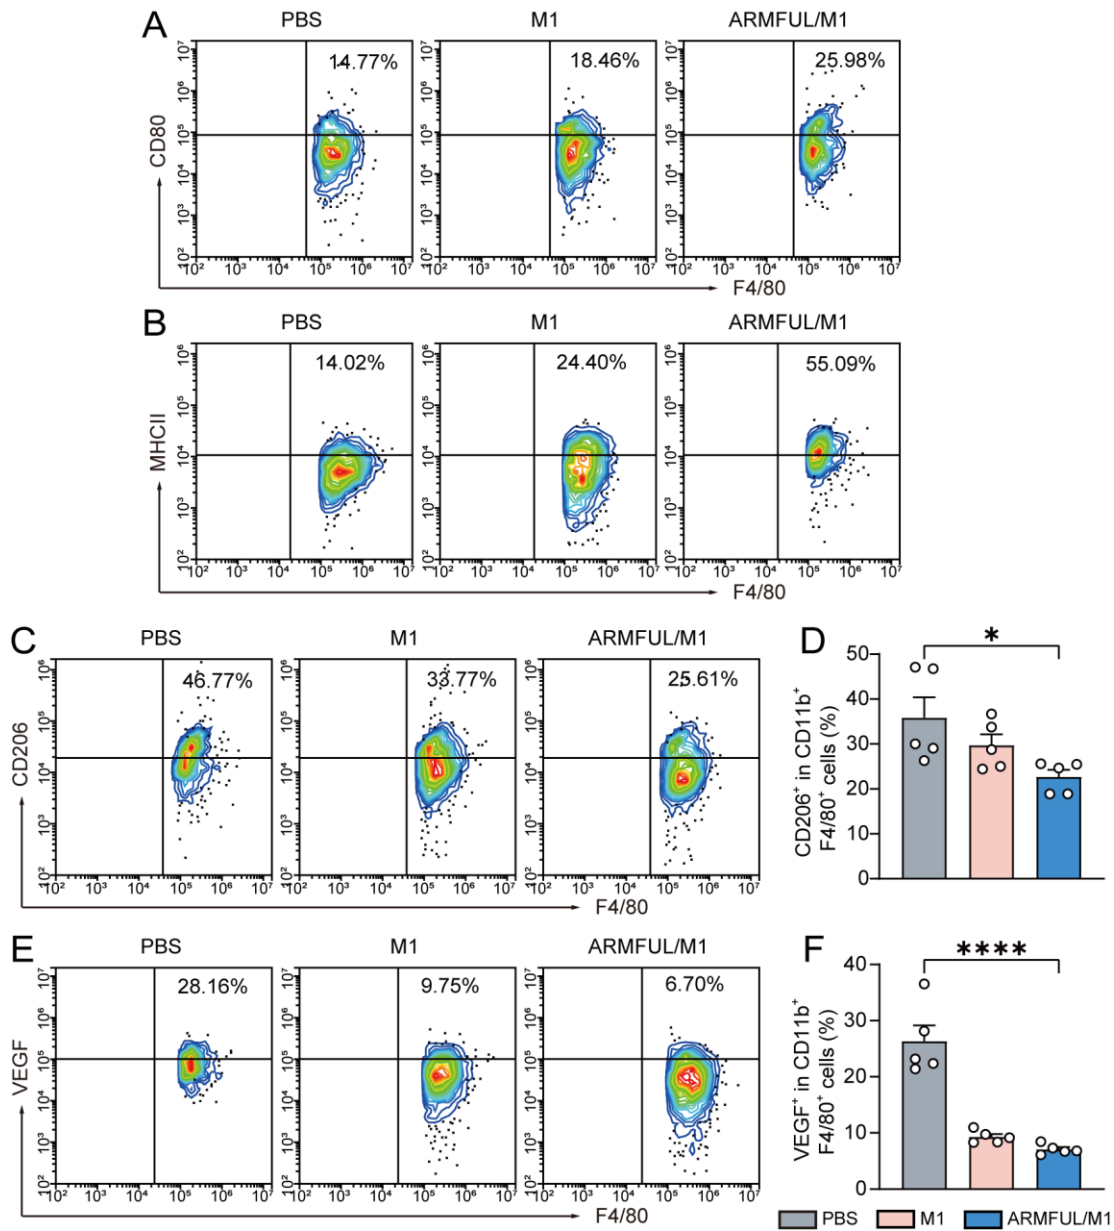

**Fig. S20. FACS analysis of macrophage phenotypes in primary tumors.**

(A, B), The percentage of CD80<sup>+</sup>, MHCII<sup>+</sup> macrophages in primary tumors. (C, D), The percentage of CD206<sup>+</sup> macrophages in primary tumors. (E, F), The percentage of VEGF<sup>+</sup> macrophages in primary tumors. The cells were gated from CD45<sup>+</sup>F4/80<sup>+</sup>CD11b<sup>+</sup> populations in the FACS profile. Data represent mean  $\pm$  SD (D, F), n = 5 biologically independent mice. Statistical significance by one-way ANOVA with Dunnett's multiple comparison tests: \* p < 0.05, \*\* p < 0.01, \*\*\* p < 0.001 and \*\*\*\* p < 0.0005.

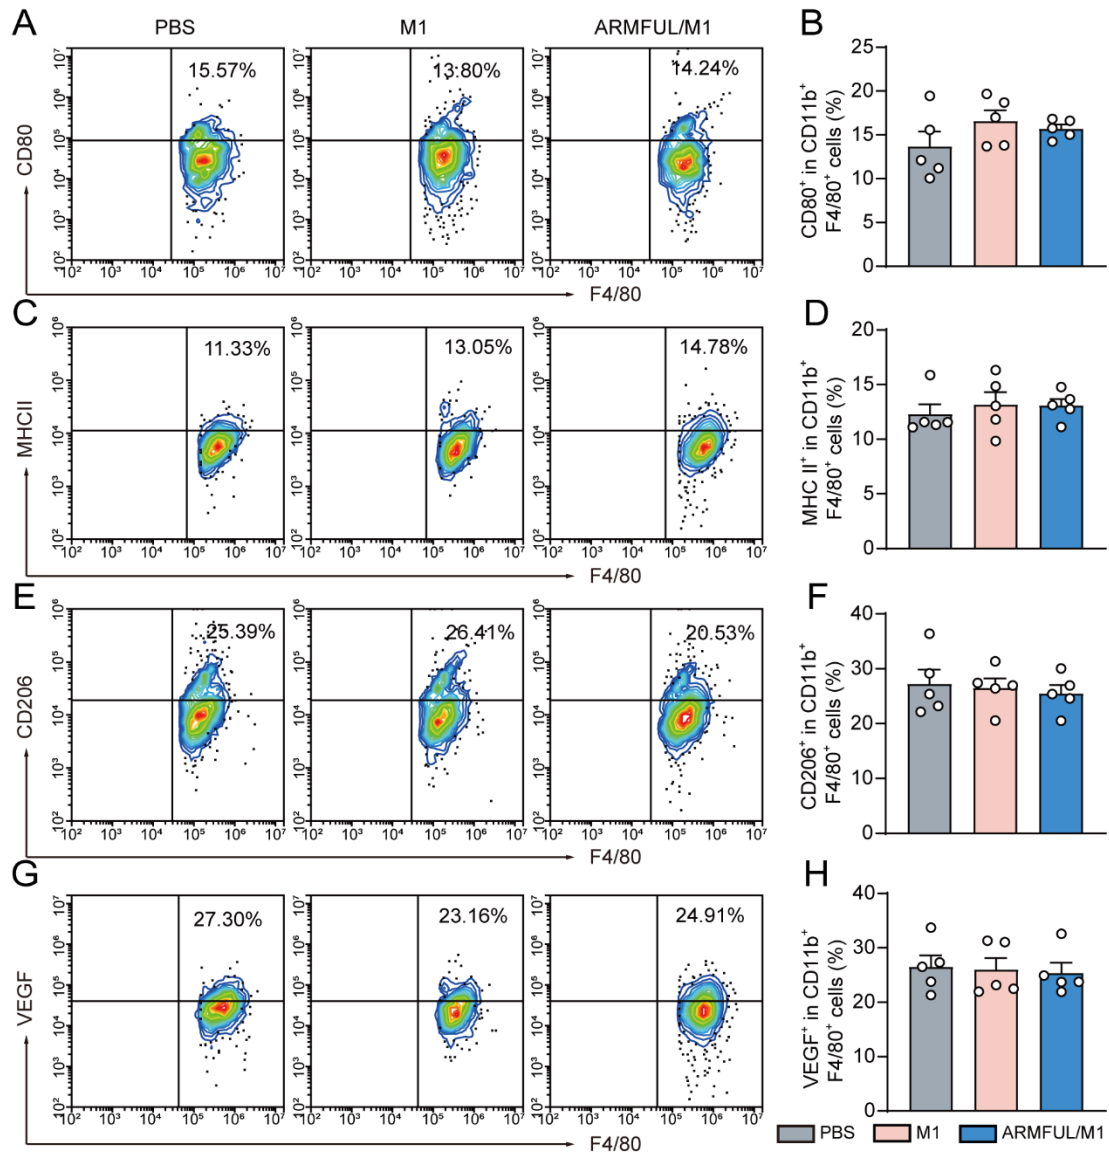

**Fig. S21. FACS analysis of macrophage phenotypes in distant tumors.**

(A-H), The percentage of CD80<sup>+</sup>, MHCII<sup>+</sup>, CD206<sup>+</sup>, and VEGF<sup>+</sup> macrophages in distant tumors. The cells were gated from CD45<sup>+</sup>F4/80<sup>+</sup>CD11b<sup>+</sup> populations in the FACS profile. Data represent mean  $\pm$  SD (B, D, F, H), n = 5 biologically independent mice.



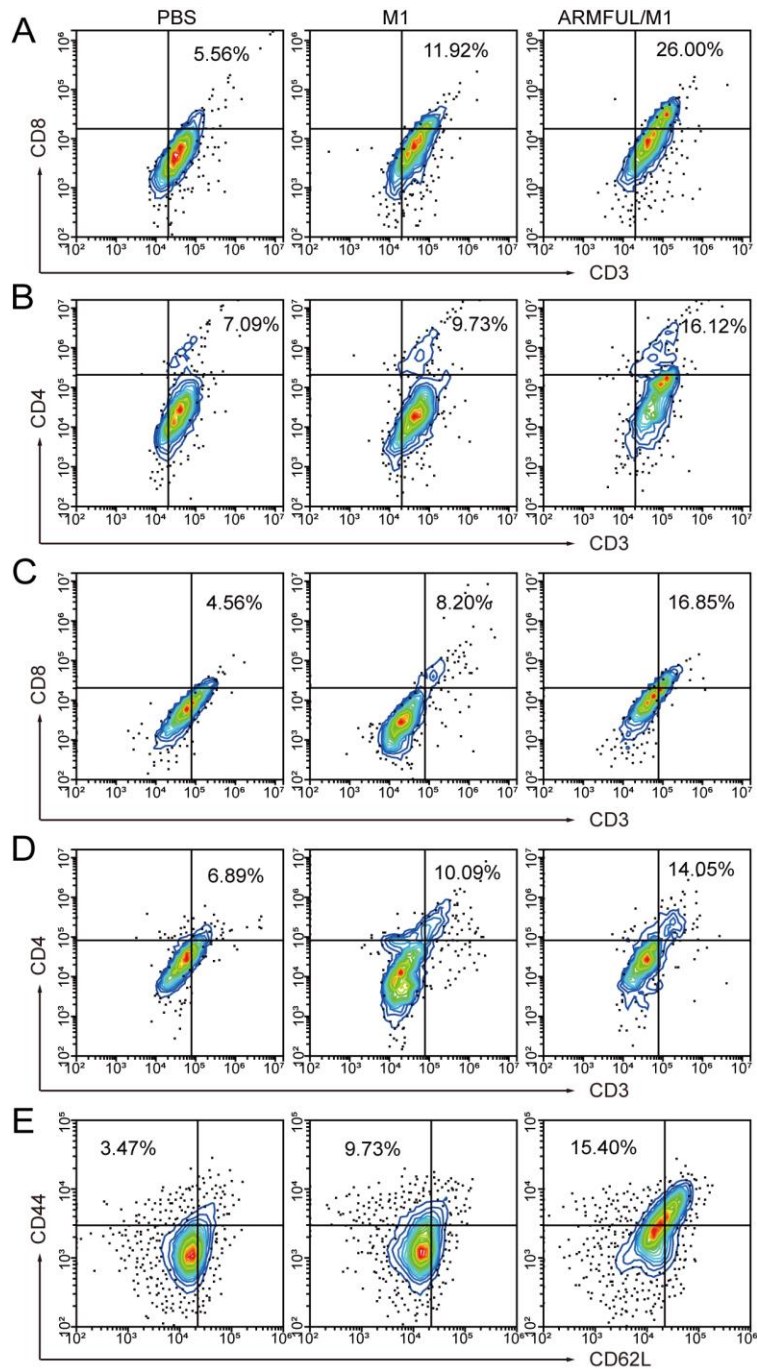

**Fig. S22. FACS analysis of T cell activation in tumors and spleens.**

(A, B), The percentage of CD8<sup>+</sup> and CD4<sup>+</sup> T cells in primary tumors. The cells were gated from CD45<sup>+</sup> populations in the FACS profile. (C, D), The percentage of CD8<sup>+</sup> and CD4<sup>+</sup> T cells in distant tumors. The cells were gated from CD45<sup>+</sup> populations in the FACS profile. (E), The percentage of effector memory T cells in the spleen. The CD62<sup>-</sup>CD44<sup>+</sup> T cells were gated from CD45<sup>+</sup>CD4<sup>+</sup> populations in the FACS profile.

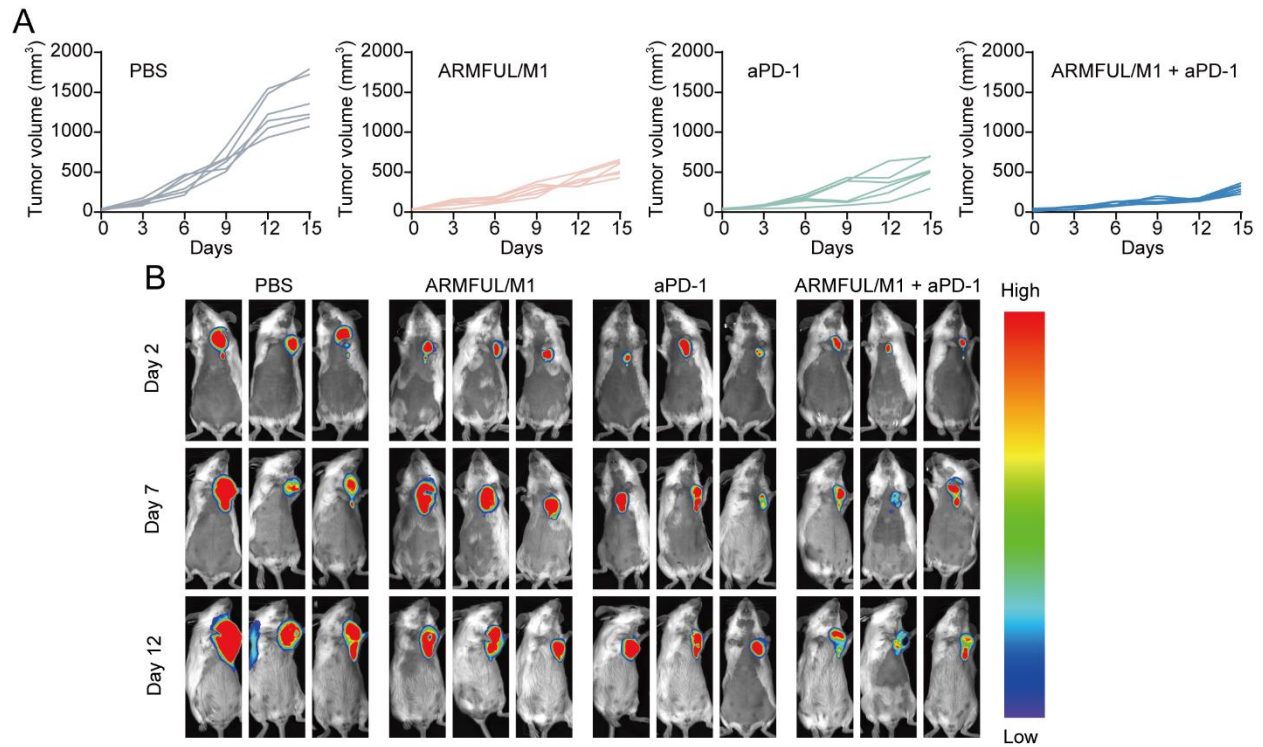

**Fig. S23. Individual tumor growth and bioluminescence imaging of mice.**

(A), Growth curves of tumors in individual mice burdened with 4T1-Luc cells after intravenous injection of PBS, ARMFUL/M1, aPD-1, and ARMFUL/M1 + aPD-1 (n = 6/group). (B), *In vivo* bioluminescence imaging of tumor growth of mice burdened with 4T1-Luc cells.

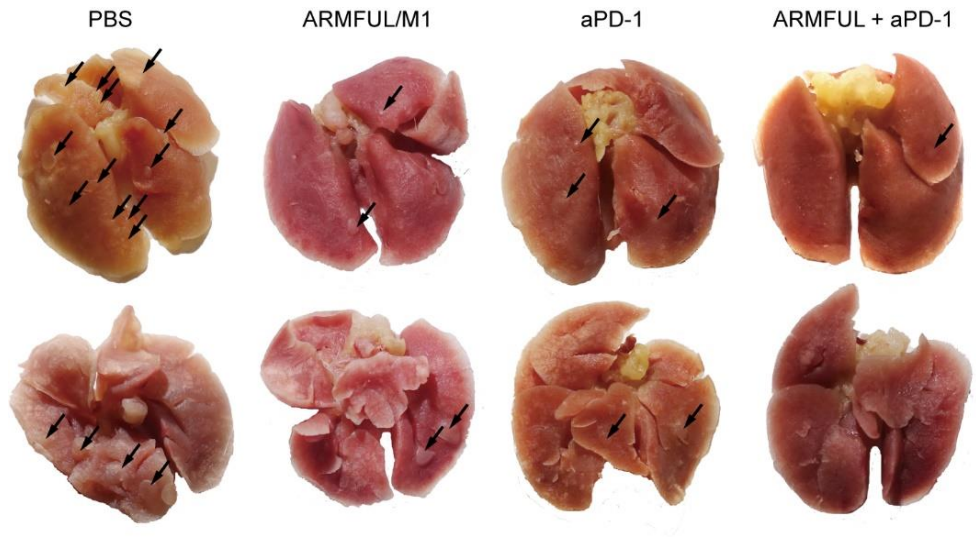

**Fig. S24. Representative images of metastatic nodules in the lung after treatment.**

**Movie S1. Macrophage phagocytosis: natural M1 macrophages cocultured with B16F10 tumor cells.**

The views in the plate were recorded through a live cell dynamic imaging and analysis system (zenCELL owl) every 10 minutes for 36 h. In the recorded images, B16F10 tumor cells were fusiform, and macrophages were round, making them distinguishable.

**Movie S2. Macrophage phagocytosis: ARMFUL engineered M1 macrophages cocultured with B16F10 tumor cells.**

The views in the plate were recorded through a live cell dynamic imaging and analysis system (zenCELL owl) every 10 minutes for 36 h. In the recorded images, B16F10 tumor cells were fusiform, and macrophages were round, making them distinguishable.
